# Supplementary material
Source: publisher figshare collection journal article supplement (https://gsajournals.figshare.com/articles/dataset/_/6622337)
Supplement: Supplementary file 1 [file 1]

## Sheet: readme
file contains filtered scores used to identify QTL. Columns detail the chromosome (I, II or III), position on that chromosome, and the score for that variant (mean of eight repeats)

## Sheet: filtered_scores
chromosome	position	score
I	60438	3.5269
I	71120	2.42047
I	78435	1.22591
I	81660	3.97966
I	84031	2.95673
I	95401	3.97289
I	101871	1.74568
I	107624	1.99402
I	109681	1.1892
I	114557	5.46935
I	115309	3.18839
I	118031	2.04986
I	118559	3.77401
I	119888	3.61102
I	121728	8.17026
I	121755	7.2137
I	124388	6.23671
I	126067	1.15786
I	126699	3.22156
I	127204	1.50191
I	132159	3.01777
I	135398	4.07051
I	135637	2.12148
I	135670	3.24298
I	135764	3.35593
I	135992	2.24883
I	136011	2.34834
I	136094	3.95038
I	139768	2.1712
I	139892	1.27653
I	140774	2.74402
I	141234	2.1363
I	146400	2.12672
I	146734	3.28556
I	149074	7.59435
I	150277	6.66963
I	152637	2.22107
I	156754	2.30548
I	162963	3.44609
I	163061	1.6583
I	168534	2.56931
I	170928	3.40401
I	173079	2.90988
I	173651	4.17644
I	187224	4.43527
I	193574	2.48208
I	196598	3.59935
I	203208	4.75257
I	206750	5.98117
I	208331	1.10864
I	217954	2.25657
I	224944	4.42678
I	227281	2.91158
I	228675	1.23621
I	240030	1.84337
I	241734	1.32981
I	264802	1.04353
I	268164	1.80966
I	274342	2.1115
I	279180	4.00868
I	307499	5.83801
I	307548	4.91008
I	314269	3.3065
I	318681	0.740031
I	326464	1.00889
I	351533	6.00316
I	365930	5.98653
I	366288	1.95768
I	366552	0.697607
I	379072	1.98946
I	381680	4.25052
I	396286	3.6249
I	400592	3.79003
I	416112	0.121264
I	427183	2.16886
I	427504	2.24542
I	450023	2.55933
I	455460	1.34578
I	461967	3.07628
I	470378	0.00129056
I	470390	0.00130618
I	477739	0.00193948
I	482737	0.00202594
I	490432	1.44971
I	490483	2.23265
I	492104	2.01188
I	492317	1.39208
I	497317	3.55405
I	502428	2.9221
I	512086	0.199497
I	522530	2.62065
I	523603	1.85208
I	523645	2.53745
I	523735	1.61559
I	523883	0.00177699
I	526170	0.00175095
I	527156	1.82637
I	535185	5.06566
I	537168	6.98003
I	548671	3.62502
I	552573	1.09491
I	553332	3.52315
I	556662	1.25062
I	559475	1.47566
I	584187	2.65043
I	593281	4.61044
I	619866	3.74634
I	640809	4.17826
I	643527	2.47978
I	657648	5.52782
I	657777	3.20728
I	660056	3.55584
I	660659	5.33717
I	668931	1.08716
I	670032	0.00200302
I	682993	1.95548
I	690059	2.38988
I	693142	1.96002
I	698824	1.6824
I	700960	1.84578
I	701647	2.0808
I	703387	2.09024
I	703514	2.72589
I	705170	5.22349
I	716765	1.45634
I	717996	0.481201
I	720197	2.00415
I	720647	1.59783
I	721570	4.47144
I	722276	4.40699
I	726817	5.347
I	729473	5.91607
I	729935	3.53201
I	735050	4.42582
I	735664	2.06123
I	749810	1.37985
I	758659	2.50821
I	759334	1.75078
I	760008	2.54893
I	760993	0.561317
I	763187	3.12893
I	763636	2.51058
I	767340	0.475783
I	769941	2.73802
I	771666	2.48501
I	773717	2.25237
I	777184	3.86227
I	779776	2.75106
I	780712	2.76239
I	784042	4.50046
I	786615	2.217
I	790818	2.14606
I	792107	1.85517
I	798751	4.07973
I	798938	0.457837
I	799749	2.80733
I	802483	2.65388
I	803785	5.19346
I	807937	4.452
I	817058	3.07516
I	830171	2.26174
I	832546	0.743759
I	836767	2.5192
I	838208	4.28766
I	849099	2.39059
I	850242	3.43715
I	856478	2.8949
I	862962	0.00188845
I	867809	1.98099
I	868116	3.99854
I	876095	3.33714
I	876698	3.53034
I	887872	2.14896
I	893979	3.16886
I	903902	2.83488
I	906754	0.823184
I	907801	2.91327
I	909669	1.21557
I	913328	0.853122
I	913483	0.854944
I	914076	2.64592
I	915605	3.36643
I	919295	4.25206
I	919796	3.0652
I	920064	4.16583
I	923393	2.14854
I	923460	4.0552
I	931722	2.58454
I	942986	1.09318
I	948072	1.45958
I	952753	2.13677
I	955590	2.72606
I	967713	3.10979
I	970338	6.08329
I	972876	6.70604
I	991586	4.22105
I	991771	2.21869
I	996498	4.72147
I	999129	6.58837
I	1003574	2.1447
I	1004207	1.36939
I	1004346	0.746752
I	1011187	2.29416
I	1014062	2.74446
I	1015941	1.95752
I	1016633	2.30197
I	1021180	0.51977
I	1021756	2.59432
I	1024664	1.96244
I	1029446	2.59444
I	1035155	1.00744
I	1035574	3.44498
I	1036625	4.29252
I	1037456	1.55247
I	1038053	1.58421
I	1041118	3.3061
I	1045874	0.962053
I	1049839	2.9516
I	1051563	2.75063
I	1059318	4.73056
I	1060482	3.81257
I	1073237	1.66299
I	1074240	1.90671
I	1075413	0.618469
I	1075590	2.69394
I	1077059	2.42931
I	1077838	1.47676
I	1109508	0.781661
I	1110692	0.731787
I	1118766	2.04714
I	1149636	6.31358
I	1155617	4.26875
I	1162878	2.7357
I	1200356	1.01179
I	1232814	0.737879
I	1233642	0.778999
I	1243065	2.26272
I	1274803	2.24523
I	1279461	2.20195
I	1287339	1.86423
I	1291995	3.97385
I	1306417	2.8044
I	1376403	2.74122
I	1404507	1.36035
I	1513782	0.349504
I	1558242	1.04309
I	1584495	0.373856
I	1604499	2.39739
I	1625092	3.59515
I	1629835	2.52783
I	1635240	0.437288
I	1645854	1.45322
I	1652483	0.988314
I	1653023	2.92183
I	1662949	3.0927
I	1663041	3.53522
I	1664907	1.83472
I	1668957	2.69875
I	1675426	1.91138
I	1681573	0.819483
I	1683991	3.23656
I	1686417	0.256043
I	1690123	1.07111
I	1697841	2.82266
I	1698607	3.63542
I	1708286	2.61387
I	1709188	3.49042
I	1710147	4.35901
I	1711746	4.05586
I	1712900	3.494
I	1715079	2.31461
I	1718889	1.9985
I	1720509	1.6736
I	1720717	2.52743
I	1723056	1.78562
I	1724688	3.00927
I	1726371	2.54587
I	1735542	3.18247
I	1741020	3.19964
I	1742403	4.03685
I	1743127	2.35392
I	1743946	3.65448
I	1744268	5.25631
I	1750050	2.21127
I	1778175	2.62395
I	1779275	1.5223
I	1783458	1.76818
I	1783898	4.44318
I	1785400	0.718274
I	1787505	1.22751
I	1789094	1.76989
I	1790665	1.35639
I	1794552	1.01325
I	1794818	1.30398
I	1795637	3.74311
I	1795888	3.0378
I	1798215	2.89933
I	1799286	4.7773
I	1804967	1.45404
I	1815634	2.75013
I	1823823	2.90962
I	1826604	0.736855
I	1828282	1.63951
I	1830832	3.72534
I	1831858	0.837425
I	1832697	1.84909
I	1835068	2.35075
I	1850614	3.19916
I	1852082	1.37406
I	1866803	1.9963
I	1888755	1.48675
I	1907362	2.08706
I	1936294	3.6413
I	1952313	0.0015895
I	1999192	0.00178637
I	2053296	3.26424
I	2055773	5.04731
I	2104097	3.54538
I	2139856	4.37221
I	2194786	2.78195
I	2206059	1.00834
I	2213620	1.40878
I	2215281	0.339917
I	2215776	0.789595
I	2217437	0.418874
I	2219486	3.31816
I	2219564	1.1854
I	2223402	1.7635
I	2226521	1.58468
I	2232713	1.10543
I	2233748	2.52984
I	2237553	2.0858
I	2237554	1.83983
I	2239917	2.82057
I	2240462	2.26625
I	2247519	2.37405
I	2248471	1.10735
I	2249085	2.225
I	2249836	3.37717
I	2258417	1.67283
I	2259309	3.24077
I	2265747	1.27209
I	2272299	4.2861
I	2273017	5.05263
I	2273166	1.32883
I	2273457	3.04959
I	2274305	0.207343
I	2275044	1.4257
I	2275239	2.88777
I	2275472	0.953007
I	2276162	2.95233
I	2277050	2.12461
I	2281265	0.638533
I	2282812	1.30425
I	2285077	2.10847
I	2285433	1.61736
I	2285892	2.74002
I	2285959	1.62048
I	2288125	1.62534
I	2288240	0.00159679
I	2288601	0.585252
I	2290591	0.839891
I	2291972	2.97941
I	2292205	2.10616
I	2292235	0.663925
I	2306350	1.35801
I	2308396	1.33024
I	2308924	1.97144
I	2309591	2.24431
I	2339902	3.80217
I	2343703	0.00179262
I	2362151	2.03083
I	2368920	1.0293
I	2372001	2.05046
I	2378252	2.05802
I	2381199	0.360459
I	2397122	4.28729
I	2400113	6.24167
I	2404423	1.747
I	2404934	0.562432
I	2405931	0.810807
I	2407950	3.05566
I	2408008	1.75478
I	2414735	1.64789
I	2415113	4.23496
I	2415445	2.33547
I	2417250	2.39013
I	2421576	2.14201
I	2422550	2.21606
I	2423311	5.79135
I	2428322	4.04445
I	2430028	2.16769
I	2431715	1.62275
I	2433360	4.1482
I	2447403	5.34151
I	2452020	5.2483
I	2452268	1.20112
I	2453204	2.29512
I	2453801	2.54332
I	2456452	2.66515
I	2472246	4.22394
I	2479545	0.926911
I	2482423	2.00753
I	2499149	2.54099
I	2506044	2.02788
I	2507462	0.00186449
I	2510060	0.00165929
I	2528993	1.89593
I	2531296	1.13092
I	2536026	3.74837
I	2537393	1.89642
I	2537789	2.72661
I	2538926	4.74525
I	2538964	2.97262
I	2541698	1.31017
I	2543911	4.16121
I	2547852	1.56787
I	2549948	3.5724
I	2550960	1.98341
I	2551368	4.14056
I	2552730	3.98732
I	2559084	2.9075
I	2561529	2.27868
I	2563712	1.0467
I	2569788	0.340933
I	2573658	4.99015
I	2576306	3.85102
I	2577598	2.09899
I	2583107	3.89236
I	2588021	0.00137805
I	2588066	1.68111
I	2594263	0.00184678
I	2594324	0.00147701
I	2594351	0.000402063
I	2594391	0.00156138
I	2594691	1.8881
I	2602912	4.17135
I	2605764	1.50878
I	2605860	1.78191
I	2607669	0.00186345
I	2611769	0.70083
I	2612379	2.2156
I	2613145	4.6359
I	2616395	3.90949
I	2617567	2.03461
I	2617646	0.448149
I	2622695	1.17055
I	2624384	1.01369
I	2624445	0.629989
I	2632746	1.89046
I	2635318	3.42321
I	2635612	2.40444
I	2638155	3.59382
I	2638959	3.90885
I	2642318	1.92307
I	2643596	4.01642
I	2646253	3.45367
I	2648315	1.5189
I	2649924	1.43924
I	2658236	4.97487
I	2658731	2.4323
I	2662845	1.95772
I	2664547	1.55688
I	2665053	3.37073
I	2666457	3.43005
I	2672690	2.28943
I	2679675	1.41255
I	2679789	1.9548
I	2683902	0.000766628
I	2689510	1.88137
I	2690004	3.2727
I	2696741	4.40399
I	2705084	2.56598
I	2710461	1.32265
I	2711477	0.928405
I	2713507	0.714901
I	2714963	1.63705
I	2716773	1.86029
I	2722524	1.58758
I	2724188	3.73854
I	2733863	4.61754
I	2734168	2.76692
I	2737405	1.36067
I	2738131	3.0869
I	2738862	1.73577
I	2741068	2.36546
I	2741326	5.64711
I	2741407	6.26621
I	2742561	3.80844
I	2744337	5.60195
I	2751415	4.96305
I	2752588	2.99802
I	2752878	2.23793
I	2760773	3.61243
I	2766135	5.33414
I	2766755	4.74034
I	2770120	5.89249
I	2779113	5.81401
I	2790594	5.65721
I	2792683	1.8881
I	2795360	3.83857
I	2797593	7.02295
I	2804242	5.53252
I	2807441	2.88661
I	2810876	1.59855
I	2811385	2.99036
I	2846353	0.986646
I	2859007	0.91101
I	2875284	1.58488
I	2901962	1.71718
I	2905076	2.04155
I	2910241	0.956987
I	2910381	0.890719
I	2911919	3.64773
I	2911931	3.89456
I	2919376	3.67413
I	2919470	1.58184
I	2923504	2.36596
I	2923570	2.82144
I	2923916	0.276036
I	2923981	0.48942
I	2924596	7.12451
I	2924608	7.43934
I	2924675	5.78721
I	2924705	6.31005
I	2924745	2.09727
I	2924785	2.64783
I	2925637	4.81366
I	2937534	0.934599
I	2937800	0.906152
I	2950891	3.28222
I	2955088	4.33999
I	2956631	2.50293
I	2960400	2.58704
I	2960709	4.00956
I	2962171	1.5579
I	2969293	1.92497
I	2972793	0.785736
I	2972850	1.72201
I	2973865	3.6015
I	2975371	2.26506
I	2975378	1.62712
I	2975424	1.12313
I	2975613	0.786603
I	2975812	5.80605
I	2975871	3.88585
I	2975925	4.11421
I	2975930	2.71864
I	2976024	1.71546
I	2976669	2.73639
I	2977438	1.07357
I	2985087	5.1225
I	2992474	3.3926
I	3002877	2.46888
I	3006775	4.37554
I	3008529	3.24452
I	3030930	1.97757
I	3034932	2.72724
I	3039178	2.03628
I	3043658	0.974607
I	3044290	3.51255
I	3050675	0.483076
I	3052540	2.8252
I	3062486	1.34202
I	3067697	3.25101
I	3068041	0.375205
I	3071168	3.04137
I	3072662	4.4103
I	3073175	6.78813
I	3074774	0.617511
I	3079796	1.15836
I	3081074	1.9467
I	3081328	0.397696
I	3084398	0.83086
I	3091148	4.84592
I	3092232	5.33703
I	3103807	3.53198
I	3103928	4.09087
I	3109392	4.13129
I	3111508	0.00180095
I	3115841	0.00175408
I	3117412	1.36464
I	3119299	0.0019999
I	3125118	0.00193219
I	3127157	1.6579
I	3128615	2.74983
I	3130247	2.45209
I	3130746	4.92047
I	3130747	5.12837
I	3134258	2.90147
I	3139763	0.92908
I	3144290	3.36597
I	3147678	2.49643
I	3149857	0.828205
I	3151749	2.25082
I	3152754	2.91133
I	3152996	3.46624
I	3154972	3.37042
I	3159275	2.12097
I	3162551	2.58207
I	3163584	2.22914
I	3164919	2.87752
I	3165202	2.4184
I	3165306	0.957009
I	3169742	1.35221
I	3175090	1.93437
I	3175428	1.54001
I	3178494	0.00181449
I	3179238	0.00186241
I	3187163	3.46046
I	3187528	4.79072
I	3197528	1.79
I	3202214	1.27403
I	3204753	4.04981
I	3204845	1.70884
I	3208458	0.934771
I	3208867	3.43783
I	3211880	1.97392
I	3227154	4.21863
I	3230578	1.45457
I	3233221	0.141328
I	3233482	1.96695
I	3234121	2.22553
I	3236385	2.79406
I	3238636	5.56227
I	3238987	3.39225
I	3239853	1.90263
I	3257850	6.05393
I	3263200	4.71278
I	3274317	4.82462
I	3284453	4.40567
I	3292079	3.57112
I	3295609	0.948143
I	3301454	1.18108
I	3304114	2.20102
I	3304235	2.77574
I	3307217	1.33173
I	3310851	2.3268
I	3313281	1.91375
I	3315647	4.80424
I	3318540	2.7601
I	3321289	2.05878
I	3327171	2.4433
I	3327476	0.828614
I	3329415	2.61179
I	3333604	1.76907
I	3334066	0.538821
I	3334500	2.8629
I	3336002	3.12106
I	3337650	4.5083
I	3337927	6.34477
I	3338243	3.55829
I	3343827	2.61369
I	3346441	5.23319
I	3356530	2.70076
I	3369139	2.40458
I	3376833	1.34274
I	3379587	3.42965
I	3386470	3.8809
I	3386527	3.27117
I	3393088	7.87139
I	3394750	7.36506
I	3396523	1.21794
I	3397933	3.83446
I	3399475	5.70165
I	3401795	6.67087
I	3402585	3.16483
I	3403801	4.54978
I	3405403	2.24592
I	3406061	0.819738
I	3407544	0.679227
I	3409582	3.25961
I	3412265	3.72125
I	3414076	5.91852
I	3415888	3.36732
I	3419823	1.0696
I	3419862	2.36983
I	3426604	2.20126
I	3427008	2.72956
I	3427224	1.57551
I	3428185	4.29593
I	3428756	4.12938
I	3428883	2.42753
I	3430883	2.6258
I	3431573	4.97896
I	3431578	5.79577
I	3436659	6.36132
I	3437646	4.26547
I	3440649	6.73851
I	3443342	0.679351
I	3450130	1.80518
I	3456618	3.67265
I	3461712	4.59456
I	3461724	4.41772
I	3468034	2.18834
I	3478401	2.33143
I	3479619	2.30465
I	3479655	2.31482
I	3480861	2.10192
I	3481600	3.37105
I	3482360	0.642
I	3482692	2.7121
I	3483426	4.21007
I	3486302	3.36318
I	3486976	2.9349
I	3488579	4.26145
I	3489517	2.89074
I	3491499	2.90001
I	3493221	1.72687
I	3494391	3.93502
I	3495446	2.9103
I	3497079	3.76317
I	3497191	4.59759
I	3498686	3.32262
I	3502508	2.03573
I	3531971	2.79692
I	3532988	5.05706
I	3538413	0.000349982
I	3538428	0.00188324
I	3538448	1.63241
I	3538830	2.28852
I	3545300	2.14314
I	3546445	3.72787
I	3550627	2.73264
I	3551987	0.676114
I	3552024	2.97125
I	3552071	3.88373
I	3552629	2.44801
I	3554341	5.11508
I	3556754	1.4983
I	3557103	3.46764
I	3558140	4.01698
I	3558465	4.57875
I	3558908	0.790845
I	3559165	1.35356
I	3559227	1.70896
I	3559228	2.31627
I	3559310	4.25226
I	3559373	2.69191
I	3559736	2.54221
I	3560317	2.61072
I	3561730	3.85395
I	3562203	3.55904
I	3563433	5.61851
I	3565954	1.45489
I	3566439	1.10771
I	3566495	1.44527
I	3568789	3.38718
I	3569269	1.17231
I	3570165	1.16664
I	3573642	4.51054
I	3578237	5.06989
I	3580364	1.79064
I	3583106	0.00182595
I	3583467	4.38542
I	3584415	2.0558
I	3586333	2.20408
I	3591880	3.63921
I	3603195	3.83671
I	3604134	1.20515
I	3604633	4.81798
I	3609672	3.83404
I	3611909	1.3288
I	3613090	4.51073
I	3621818	4.7551
I	3629158	0.821062
I	3632252	1.73079
I	3641230	1.5747
I	3642665	0.772242
I	3645342	1.17761
I	3661146	6.68821
I	3665369	5.29025
I	3665610	0.00153638
I	3672839	0.548897
I	3678357	1.66289
I	3678727	1.20665
I	3684496	2.97766
I	3697229	4.89594
I	3698713	2.73797
I	3710247	2.03211
I	3715680	4.21826
I	3723280	5.58985
I	3723871	2.39354
I	3730369	3.62328
I	3745990	3.82513
I	3746038	5.3227
I	3746435	3.69959
I	3746461	5.8655
I	3746658	7.08862
I	3747074	6.15862
I	3747722	2.08496
I	3747771	2.13898
I	3748943	4.40605
I	3769079	2.79703
I	3769282	2.97063
I	3769319	3.02795
I	3793843	10.7032
I	3793857	8.65502
I	3795276	3.50811
I	3798207	1.96366
I	3800506	0.664688
I	3800967	3.91192
I	3801939	1.70092
I	3803011	4.22098
I	3803249	6.3572
I	3805788	8.05421
I	3806282	1.84406
I	3806765	0.971394
I	3809077	2.43042
I	3816912	2.30895
I	3825586	2.03712
I	3826058	4.74104
I	3827184	2.38472
I	3835951	2.392
I	3836635	3.06131
I	3839798	1.0045
I	3839963	2.80136
I	3841555	1.88242
I	3841658	3.18992
I	3842442	1.70957
I	3842804	6.08292
I	3843178	6.20245
I	3844103	6.66453
I	3844432	4.46769
I	3844509	3.06824
I	3844514	3.55157
I	3845516	0.0969322
I	3846036	1.19736
I	3855790	0.00170408
I	3861939	1.29407
I	3864813	1.68226
I	3872514	3.30747
I	3880631	2.81014
I	3880734	2.36393
I	3881720	3.33024
I	3885809	2.83629
I	3887309	1.38386
I	3887516	2.38199
I	3891585	5.11307
I	3891845	2.4896
I	3893700	0.572841
I	3902953	1.73801
I	3905817	1.58994
I	3906505	0.481273
I	3911992	2.85253
I	3915368	2.20502
I	3917561	4.61534
I	3919690	2.93788
I	3921447	1.57139
I	3926065	4.09051
I	3926238	3.68776
I	3934779	1.30585
I	3940025	0.81473
I	3940386	1.81917
I	3942346	2.64103
I	3942863	0.605581
I	3945800	1.81788
I	3947859	3.33094
I	3948720	3.50336
I	3952276	3.19644
I	3957166	4.31059
I	3961988	3.55714
I	3964442	1.97435
I	3965387	0.897137
I	3968766	1.1492
I	3968899	0.29027
I	3969803	1.40243
I	3971898	3.38878
I	3972635	1.15778
I	3973672	0.542462
I	3974700	0.918167
I	3978139	0.855222
I	3985634	3.08443
I	3987093	0.818109
I	3987440	0.923564
I	3988184	1.35798
I	3993070	2.2049
I	4006684	2.41843
I	4010783	2.45546
I	4014936	4.03317
I	4036451	3.76974
I	4039429	2.85316
I	4046246	3.42814
I	4046551	2.39576
I	4047995	0.688058
I	4056859	3.96
I	4056914	5.52235
I	4088670	1.85947
I	4089310	2.44953
I	4090326	2.42433
I	4101706	5.07953
I	4112297	2.01223
I	4113869	1.14498
I	4115061	2.11157
I	4135582	2.3693
I	4141458	3.94302
I	4142796	2.80571
I	4154587	3.07486
I	4154835	1.9773
I	4159558	4.3057
I	4161340	4.90116
I	4163710	3.00161
I	4168015	4.47152
I	4172856	4.21361
I	4174324	2.35536
I	4174909	2.50491
I	4184603	2.50388
I	4185931	1.46489
I	4186157	3.536
I	4187435	2.54519
I	4188251	4.05819
I	4194793	3.64792
I	4199795	0.589511
I	4201103	2.93514
I	4203244	2.13734
I	4206091	4.52522
I	4210365	2.76899
I	4213868	0.822333
I	4214509	4.86776
I	4219394	3.06706
I	4219981	2.56366
I	4220942	0.904988
I	4222549	2.32741
I	4223330	0.730132
I	4223588	1.32123
I	4230497	7.41986
I	4246454	5.33525
I	4248268	3.28365
I	4248320	0.835586
I	4252542	2.84122
I	4254874	3.47789
I	4254946	1.57613
I	4255068	4.0589
I	4255500	2.46985
I	4268319	3.04516
I	4278251	2.84538
I	4278660	0.692804
I	4281981	2.10339
I	4288609	2.10018
I	4293108	3.22692
I	4295415	3.65464
I	4295935	5.04703
I	4296681	2.89199
I	4298901	4.24744
I	4299046	3.31902
I	4303877	2.49713
I	4304169	1.77984
I	4304205	3.50292
I	4304635	0.929354
I	4306460	2.73686
I	4307129	1.1394
I	4330012	1.93046
I	4331957	4.45095
I	4333105	4.02087
I	4334977	2.70698
I	4341360	1.80039
I	4342712	3.73429
I	4351472	2.8896
I	4352197	2.34602
I	4354161	2.41694
I	4359787	4.8407
I	4368355	3.81227
I	4370980	2.4052
I	4374342	0.00190824
I	4375191	2.58056
I	4375421	0.00198844
I	4396205	0.924748
I	4397063	1.55079
I	4399883	2.74816
I	4406782	2.65311
I	4407494	0.00193323
I	4410191	0.00189053
I	4431856	0.00126764
I	4431868	0.00123327
I	4442714	0.00164887
I	4445058	0.920808
I	4445769	4.33634
I	4448727	3.71574
I	4451508	3.88398
I	4451687	3.43917
I	4453280	4.80812
I	4457058	1.73129
I	4457171	2.74778
I	4457944	2.98288
I	4458081	1.25302
I	4459613	0.630915
I	4461671	3.22514
I	4463093	3.07086
I	4467160	3.67047
I	4471094	1.74781
I	4473108	2.53944
I	4473996	2.23812
I	4474485	1.30908
I	4479529	0.986779
I	4486224	6.20736
I	4487765	3.61146
I	4488482	3.35367
I	4488931	1.97711
I	4490801	1.77649
I	4492190	1.14078
I	4493797	0.2949
I	4494289	0.854165
I	4495000	1.4339
I	4495602	0.568535
I	4496094	3.82005
I	4496375	2.29874
I	4501211	1.51709
I	4501839	3.85349
I	4502446	4.19993
I	4502447	3.95576
I	4513710	3.35749
I	4531317	1.37704
I	4532855	1.83425
I	4534429	3.32435
I	4537999	3.58365
I	4544534	1.80701
I	4549139	4.11159
I	4549585	3.05063
I	4552805	2.6455
I	4552831	3.24709
I	4555643	0.682134
I	4555765	3.90885
I	4560258	3.22248
I	4565672	3.23031
I	4567540	1.84605
I	4571644	4.48749
I	4573241	4.17621
I	4579546	1.28531
I	4582389	3.09745
I	4583262	0.550639
I	4585323	2.53844
I	4585663	3.20641
I	4587327	2.56797
I	4588747	5.38887
I	4595875	2.75741
I	4602196	5.1881
I	4611044	5.14378
I	4611413	3.58237
I	4611630	1.0204
I	4623794	2.13241
I	4628997	1.20078
I	4630344	2.93765
I	4632164	2.53085
I	4637428	3.65198
I	4642420	1.32611
I	4644147	2.51537
I	4649626	2.49019
I	4651585	2.15193
I	4653610	3.55881
I	4656228	0.813535
I	4677707	1.10504
I	4678003	2.83444
I	4680893	1.34247
I	4703251	2.64716
I	4706739	1.32919
I	4711702	4.15608
I	4714637	2.05801
I	4722312	3.74935
I	4722661	1.68562
I	4724462	1.65848
I	4724478	4.17188
I	4725258	2.93001
I	4728203	4.20317
I	4730586	5.36222
I	4764151	1.97216
I	4765896	3.32304
I	4779078	4.97125
I	4783551	2.21518
I	4787008	3.07569
I	4790800	1.52002
I	4792631	2.39052
I	4797078	3.22017
I	4806035	0.645264
I	4806881	2.58264
I	4808987	2.72404
I	4810275	3.46512
I	4816280	0.790464
I	4822341	3.24217
I	4841463	3.02814
I	4855480	1.17759
I	4869543	2.57292
I	4871168	2.41841
I	4877836	3.68218
I	4878684	1.73717
I	4878876	1.15354
I	4880604	2.29207
I	4881223	1.65518
I	4881369	1.94431
I	4883867	3.43871
I	4890707	2.69234
I	4891246	2.90309
I	4894431	4.3681
I	4895912	1.24576
I	4897042	1.38328
I	4901603	0.792767
I	4902563	2.27177
I	4905294	3.95706
I	4912527	5.26116
I	4916256	2.54843
I	4919475	1.54289
I	4919603	0.00187074
I	4923147	2.36571
I	4928297	1.91356
I	4929349	1.97313
I	4929656	3.73157
I	4929842	3.03671
I	4930031	0.912554
I	4930551	1.8542
I	4935034	0.565163
I	4936646	0.991256
I	4937678	2.72951
I	4937764	1.20848
I	4937779	2.28186
I	4938881	2.34383
I	4938919	2.26029
I	4939004	2.43334
I	4939378	2.89342
I	4939589	1.62474
I	4947071	0.728711
I	4961351	1.27717
I	4962262	1.46867
I	4962445	2.87623
I	4967077	3.64189
I	4973364	1.15889
I	4979931	2.17253
I	4993114	2.86119
I	4994520	1.32529
I	5020022	1.98167
I	5030169	2.48051
I	5049041	1.94129
I	5073632	1.97717
I	5120539	1.74961
I	5128407	1.01383
I	5142627	0.00196657
I	5200800	4.32795
I	5201900	2.31292
I	5202829	1.70859
I	5203011	1.73291
I	5222186	1.69691
I	5224806	2.49775
I	5224994	4.00218
I	5225183	1.09461
I	5227712	3.30486
I	5231322	1.72159
I	5246341	2.39114
I	5248208	1.05898
I	5250142	3.36466
I	5255381	4.09373
I	5255734	3.94809
I	5256380	2.9615
I	5256872	1.27778
I	5266261	6.198
I	5267647	4.44373
I	5270959	7.00056
I	5271744	7.42848
I	5277108	5.55627
I	5284158	4.3181
I	5299897	3.34917
I	5300710	1.84932
I	5303296	2.76763
I	5306093	3.01717
I	5310680	1.69327
I	5314033	2.0066
I	5319716	3.01178
I	5340766	3.87267
I	5360505	2.50763
I	5361407	5.12462
I	5368262	0.00131347
I	5368273	0.00148847
I	5373938	3.48948
I	5376094	1.5461
I	5383505	4.04075
I	5387396	3.60645
I	5390469	6.01217
I	5394093	0.98373
I	5400080	1.72605
I	5403412	7.84177
I	5426620	10.2207
I	5448529	1.15335
I	5449783	3.43891
I	5451430	1.87004
I	5451709	2.90187
I	5451921	6.90782
I	5451933	4.62587
I	5452741	4.91286
I	5453538	5.46653
I	5453760	2.10227
I	5454098	2.69573
I	5458387	0.779347
I	5459588	6.41624
I	5461226	5.69457
I	5462696	3.55441
I	5463755	1.72909
I	5466008	3.67927
I	5466395	3.42696
I	5466444	1.36567
I	5468795	2.80381
I	5468967	4.15946
I	5470283	2.62497
I	5471135	3.20133
I	5474300	2.69318
I	5487938	1.99124
I	5490189	0.951105
I	5493950	1.31129
I	5501962	2.14722
I	5508860	2.46069
I	5516194	1.67777
I	5528515	1.70236
I	5536460	1.26918
I	5541463	1.82197
I	5543827	1.13613
I	5544351	2.70842
I	5545601	1.51392
I	5547223	1.43362
I	5553327	1.94243
II	35275	2.70549
II	39218	5.66527
II	43203	3.99871
II	46866	4.74813
II	50765	7.27991
II	57064	3.74612
II	58098	3.95316
II	60474	2.48342
II	64433	0.799286
II	67383	3.44652
II	67416	1.47575
II	71084	1.30697
II	73097	2.46411
II	82108	5.90994
II	83269	4.49521
II	91143	8.70416
II	91167	8.50551
II	103666	4.43255
II	104126	5.27581
II	106638	1.87374
II	113036	2.07836
II	113054	4.7175
II	113945	2.72097
II	116532	4.30729
II	117005	0.490089
II	117703	1.25823
II	118213	2.00448
II	118229	3.44382
II	118667	4.86871
II	118721	5.5854
II	118787	6.3227
II	119297	1.87024
II	126452	2.02898
II	126926	4.22627
II	128001	2.10357
II	129800	1.76989
II	129802	2.47881
II	130140	4.78091
II	131045	2.76945
II	135141	1.47151
II	142175	3.52451
II	146079	1.71967
II	148307	2.40839
II	154603	2.19356
II	166447	5.29835
II	172876	4.41478
II	175409	1.73211
II	177201	2.18849
II	177321	4.48411
II	179610	0.464165
II	183149	2.10843
II	185948	3.49625
II	189661	2.06665
II	190046	3.02871
II	190613	2.59573
II	193726	9.77788
II	194648	8.91626
II	199844	4.78174
II	199990	7.13449
II	200190	7.59825
II	201831	11.1962
II	205692	9.77342
II	206606	5.13599
II	223868	7.47252
II	228767	2.14163
II	229621	4.46005
II	247890	2.73251
II	249852	2.97669
II	252273	3.60405
II	254484	4.68268
II	266718	2.34472
II	266780	1.70298
II	269761	1.83015
II	276539	1.68691
II	281305	4.91384
II	282552	6.85886
II	304768	6.51741
II	310824	4.47868
II	311985	2.1222
II	312293	2.55726
II	314607	3.54544
II	316888	1.11134
II	317300	2.68501
II	317914	2.13092
II	318046	5.30449
II	318122	6.62528
II	318529	3.13905
II	319742	3.30799
II	362470	2.11313
II	376806	0.738067
II	387522	1.99951
II	390890	4.4489
II	401014	2.31014
II	446065	3.68165
II	453883	3.34375
II	456252	4.06173
II	458051	3.98302
II	458422	1.62286
II	459484	3.40145
II	459969	4.45667
II	518792	5.04259
II	522946	4.03071
II	524304	1.46151
II	526776	1.2741
II	529276	0.80503
II	530256	2.34244
II	532019	5.17951
II	538149	2.83052
II	538238	2.35686
II	538328	1.83717
II	540780	4.47565
II	547463	0.510382
II	549453	1.65425
II	552837	1.23681
II	553162	1.86963
II	554049	3.96909
II	554652	1.51446
II	559076	4.55885
II	562317	3.73818
II	571311	1.90955
II	577078	2.83896
II	578601	1.35643
II	586073	2.12457
II	586282	3.19707
II	590033	2.18112
II	598081	1.74583
II	602525	2.58154
II	621032	1.66723
II	622256	2.02162
II	624921	0.923843
II	627904	2.84784
II	629720	2.74852
II	630280	2.20278
II	631846	3.64802
II	632609	2.35981
II	633455	4.78636
II	633537	4.31782
II	634844	2.7203
II	635181	1.59
II	636281	4.80406
II	638217	3.53575
II	639147	1.71911
II	640381	3.3618
II	641457	3.11457
II	644049	1.28455
II	644204	1.34732
II	646069	2.92001
II	646829	0.302584
II	647008	2.1722
II	647424	5.66861
II	648376	3.8819
II	648965	2.09698
II	649100	2.55998
II	649467	2.75697
II	649796	2.18792
II	650307	1.14201
II	651203	1.4378
II	652435	2.74088
II	652732	2.00806
II	652864	1.25286
II	655148	2.92103
II	656220	1.70044
II	657154	3.40267
II	657485	0.77651
II	661645	3.58944
II	661813	2.34747
II	661884	2.66906
II	663065	3.61941
II	667722	2.21138
II	669974	3.26765
II	676733	2.38032
II	676810	4.01705
II	678243	2.05082
II	679828	2.39444
II	685728	0.00196032
II	685818	0.88735
II	688764	1.31845
II	704814	2.87677
II	706266	2.87466
II	710401	3.81816
II	729240	6.08437
II	744593	3.24714
II	750020	2.67404
II	752796	1.59171
II	767643	0.325941
II	771542	2.95153
II	775513	4.40403
II	776272	3.79544
II	780636	7.69692
II	782574	5.32678
II	788440	1.8425
II	808514	0.859106
II	813287	2.54653
II	828758	2.49855
II	832348	5.02093
II	852801	2.45857
II	869806	0.0019374
II	879033	2.04858
II	888599	0.00173637
II	903106	0.00203427
II	903483	1.80973
II	918731	3.28889
II	923543	1.77336
II	934158	2.4767
II	943554	0.00171033
II	947419	0.844091
II	947629	1.82548
II	950619	2.36344
II	954394	1.19213
II	959488	3.11507
II	961380	1.16546
II	967094	1.83237
II	972337	2.54301
II	972821	3.8598
II	972822	4.09448
II	981623	2.71392
II	997566	5.95038
II	1014533	5.72477
II	1029416	1.43675
II	1035190	3.89335
II	1036481	2.49915
II	1040015	0.732863
II	1043809	1.33111
II	1044267	3.66583
II	1044340	3.91391
II	1049402	0.978624
II	1056373	2.29451
II	1072429	5.92519
II	1077751	6.73895
II	1078646	2.61049
II	1082354	4.02867
II	1095127	2.46631
II	1095201	4.77002
II	1098534	7.01859
II	1098557	7.27664
II	1103253	6.66324
II	1103916	5.87947
II	1104245	6.20439
II	1104247	4.74372
II	1107973	4.40984
II	1111869	10.2725
II	1112714	7.74986
II	1129739	6.69156
II	1131703	7.14087
II	1134117	5.96008
II	1136249	6.56827
II	1141354	5.18146
II	1151936	9.36617
II	1152197	10.8402
II	1159678	0.00180824
II	1159694	1.67464
II	1165720	4.99141
II	1169040	7.4886
II	1169213	7.87972
II	1171666	8.66154
II	1173261	7.165
II	1174437	8.68185
II	1187496	4.33869
II	1190191	6.5021
II	1209675	2.57179
II	1210185	2.93963
II	1213407	7.05352
II	1214480	7.51929
II	1214525	4.97819
II	1215019	1.72323
II	1215286	2.35078
II	1215851	11.2663
II	1216499	9.56808
II	1216900	10.498
II	1227523	2.92673
II	1228037	4.52857
II	1230251	5.64273
II	1235053	1.94613
II	1237199	2.85957
II	1237261	3.349
II	1240518	1.10976
II	1244159	1.4709
II	1249066	3.11731
II	1250953	2.75863
II	1252566	3.05369
II	1254778	2.93576
II	1256904	1.88642
II	1258005	2.89828
II	1261632	1.73868
II	1265105	1.59627
II	1265217	1.6466
II	1269493	2.9601
II	1277368	1.07051
II	1278884	2.56128
II	1296563	3.60513
II	1299204	2.8552
II	1300765	1.73047
II	1306392	3.06109
II	1308029	0.991696
II	1308618	0.342562
II	1314587	0.399139
II	1322286	0.0971072
II	1325393	2.24846
II	1325989	3.29599
II	1329505	2.25804
II	1330139	1.13281
II	1331978	3.20493
II	1333602	1.29629
II	1336263	3.43435
II	1338485	3.08041
II	1342952	0.670323
II	1344853	1.84988
II	1347404	1.96353
II	1350204	3.36547
II	1352324	2.2959
II	1355404	2.53008
II	1358113	2.7824
II	1358176	3.70804
II	1360937	0.875847
II	1363775	2.60739
II	1367058	0.905916
II	1367623	4.88095
II	1372270	2.25664
II	1376288	2.61234
II	1376588	1.34385
II	1376785	2.55728
II	1383350	4.63429
II	1383861	1.66125
II	1385425	2.61521
II	1389393	2.02764
II	1392672	1.33445
II	1393028	2.46073
II	1394669	2.10486
II	1394675	2.56524
II	1395978	4.86042
II	1396005	3.10281
II	1397232	1.19874
II	1397312	1.37362
II	1397511	1.77298
II	1399287	0.375982
II	1400580	2.69922
II	1402934	1.89241
II	1403045	2.674
II	1403061	2.54614
II	1405517	1.45146
II	1405993	1.28209
II	1406298	0.951598
II	1406813	2.35714
II	1408792	2.54406
II	1409637	1.54516
II	1412304	1.0098
II	1413673	0.954048
II	1422317	2.03841
II	1433973	2.77169
II	1435315	3.05322
II	1435991	3.41649
II	1437183	3.48882
II	1452255	2.5703
II	1455201	0.903849
II	1468794	1.2399
II	1488801	2.08955
II	1494128	4.36238
II	1516573	4.33912
II	1538123	4.68717
II	1545886	0.55332
II	1575367	2.17946
II	1672859	1.83005
II	1673002	0.00166658
II	1678693	0.00142076
II	1683324	1.77129
II	1685885	0.704812
II	1697124	0.00190407
II	1706465	2.11904
II	1716318	2.2901
II	1716326	0.000769752
II	1740747	2.38011
II	1747580	3.96264
II	1750558	3.92378
II	1784826	1.68885
II	1812190	0.867347
II	1829071	0.424093
II	1849777	0.00194053
II	1861420	0.00205823
II	1873779	0.00156034
II	1897778	1.90098
II	1928449	0.999637
II	1931257	1.50752
II	1941966	0.000993699
II	1941982	0.000991616
II	1942534	1.82598
II	1944246	1.69629
II	1945701	3.531
II	1946769	5.73018
II	1948303	4.57567
II	1948474	3.82046
II	1949254	4.40418
II	1949561	2.88194
II	1960392	0.00186865
II	1962419	0.00177699
II	1962439	0.00180095
II	1962458	0.00179053
II	1987101	0.00161346
II	1987117	0.00150617
II	2007715	2.18093
II	2031514	3.51144
II	2044929	0.0017322
II	2049891	0.0016895
II	2053516	0.00165096
II	2086507	3.88277
II	2091743	1.52652
II	2108180	0.00169158
II	2144402	1.06048
II	2147726	0.0015218
II	2187407	0.00127181
II	2202682	1.86988
II	2219928	0.00182699
II	2228418	2.72716
II	2228775	3.71422
II	2228777	3.24375
II	2229030	2.69803
II	2302895	3.65539
II	2304929	4.28969
II	2305695	1.18932
II	2310884	3.41783
II	2311107	2.7245
II	2312083	0.869048
II	2314411	3.5256
II	2317549	2.2615
II	2322353	2.76833
II	2323914	3.69783
II	2326615	5.28649
II	2328246	3.89704
II	2328339	2.80902
II	2329401	6.14124
II	2329425	8.43784
II	2329747	1.64421
II	2330408	1.97892
II	2367068	4.28497
II	2378455	1.92174
II	2385042	0.625595
II	2420208	5.90447
II	2425776	4.93011
II	2427851	2.02556
II	2435580	2.04766
II	2436559	1.35194
II	2436580	1.79825
II	2436911	2.23266
II	2442588	5.94329
II	2442617	4.4053
II	2444081	3.11809
II	2444308	1.94772
II	2444543	0.00168533
II	2446853	2.83501
II	2447183	2.9555
II	2450844	2.13156
II	2450917	2.09198
II	2451069	0.284956
II	2452181	4.47994
II	2457217	3.20549
II	2461512	3.85414
II	2461523	4.4983
II	2461663	6.93382
II	2461833	4.79084
II	2461868	5.40815
II	2461927	7.40769
II	2475391	2.6912
II	2480814	3.86963
II	2481614	4.33852
II	2481873	4.41318
II	2482267	3.78147
II	2485433	4.97194
II	2486201	0.269277
II	2486597	2.40889
II	2488567	0.296243
II	2491071	4.66694
II	2492074	2.67902
II	2492848	2.89689
II	2493439	4.6103
II	2494009	1.81897
II	2494152	1.41685
II	2495113	2.06409
II	2496930	1.65269
II	2497442	3.43409
II	2505327	6.06702
II	2512008	4.57862
II	2527314	6.66251
II	2527344	7.66
II	2528629	3.04228
II	2536217	2.90788
II	2549699	1.39574
II	2552492	2.38052
II	2552920	1.49997
II	2553226	2.11519
II	2560434	2.41323
II	2564322	2.1554
II	2566252	2.12765
II	2567419	2.51034
II	2574293	4.20835
II	2576499	4.06744
II	2578048	1.10688
II	2580336	3.40827
II	2584532	7.66761
II	2585748	6.07002
II	2588585	5.28842
II	2588600	4.40586
II	2589579	4.17182
II	2589980	1.62319
II	2591332	3.05318
II	2591800	1.69032
II	2591828	3.21395
II	2592354	4.54409
II	2592423	1.23022
II	2594690	1.06629
II	2594874	4.59742
II	2596776	2.21809
II	2597329	4.66147
II	2602016	6.58271
II	2605195	3.20987
II	2605424	4.29848
II	2621507	2.44967
II	2640722	2.93267
II	2646387	1.14414
II	2660451	4.08444
II	2666971	1.86966
II	2671518	4.44984
II	2700039	1.47074
II	2703372	3.73037
II	2703609	4.02051
II	2704151	3.81896
II	2704785	2.99939
II	2714381	3.87051
II	2714724	2.95573
II	2720951	3.8152
II	2729382	2.9895
II	2731039	5.49721
II	2732328	6.48786
II	2734472	4.20418
II	2742289	2.84482
II	2742981	3.64718
II	2744831	1.72271
II	2748663	2.03607
II	2748664	2.23177
II	2748665	1.94257
II	2748716	4.61197
II	2751781	1.59524
II	2755638	3.56425
II	2762354	4.06199
II	2767823	3.30363
II	2768635	3.73054
II	2768734	1.74567
II	2768935	3.27043
II	2769421	3.53516
II	2771112	3.90394
II	2772010	1.85403
II	2774163	1.58346
II	2775791	2.18307
II	2776920	0.70444
II	2777006	1.93651
II	2780876	3.01406
II	2781847	2.51309
II	2784850	1.6849
II	2787857	3.75431
II	2788933	0.00183428
II	2790236	0.926571
II	2790475	1.69221
II	2791034	1.04362
II	2794458	1.30369
II	2798040	0.00167283
II	2798514	0.00169471
II	2802046	1.98146
II	2813594	5.19131
II	2870909	3.86537
II	2887120	0.758167
II	2887828	0.565287
II	2889260	4.61376
II	2894685	2.57518
II	2897577	2.03286
II	2898950	2.75444
II	2899020	0.941232
II	2901509	1.75254
II	2902515	1.49739
II	2906580	4.10839
II	2911384	4.02554
II	2914340	2.68107
II	2930443	3.87471
II	2930479	4.2619
II	2931289	3.78971
II	2936853	3.61745
II	2943264	5.77107
II	2949279	6.56471
II	2950784	6.10827
II	2971940	0.97913
II	2978734	1.46262
II	2999276	3.51729
II	3002444	4.11302
II	3006137	3.42769
II	3010646	5.54475
II	3011838	2.26628
II	3013966	2.17505
II	3014508	2.74172
II	3015099	3.82979
II	3015211	2.11813
II	3016404	6.13484
II	3016579	3.73214
II	3017752	5.16796
II	3017943	5.57121
II	3018142	3.48365
II	3018646	4.58332
II	3020391	6.64005
II	3020427	6.44255
II	3020777	2.19221
II	3020860	3.20521
II	3027452	2.98477
II	3031785	4.74761
II	3032678	1.98361
II	3034278	3.7926
II	3035305	3.46412
II	3037983	1.82939
II	3040517	4.21699
II	3040965	5.05206
II	3041368	4.43916
II	3043498	2.95676
II	3051187	2.31463
II	3053568	3.61948
II	3058758	0.809095
II	3061757	3.10533
II	3063133	1.24576
II	3063931	4.16999
II	3067944	4.69261
II	3069389	4.02001
II	3069863	2.13925
II	3072371	4.25306
II	3088149	3.57373
II	3088506	6.05351
II	3090407	6.27784
II	3102108	4.58163
II	3103772	2.31292
II	3104298	1.43502
II	3104836	4.33238
II	3104917	3.50001
II	3113602	0.580932
II	3113825	2.53728
II	3114084	0.922883
II	3119446	3.02589
II	3119966	3.64627
II	3122116	3.40452
II	3125431	1.5528
II	3127653	4.9416
II	3128399	4.1038
II	3130346	0.504792
II	3131657	1.92385
II	3132264	1.11009
II	3132620	4.00626
II	3132740	4.47413
II	3139222	4.59387
II	3144379	3.33649
II	3146912	3.8738
II	3159888	4.66437
II	3161849	2.13458
II	3165194	4.30708
II	3166017	3.28161
II	3166406	3.86543
II	3171020	2.03326
II	3172969	4.66343
II	3178256	3.80101
II	3179263	5.23747
II	3181643	3.49295
II	3185865	5.23222
II	3187628	5.19206
II	3188440	3.9793
II	3190268	5.03667
II	3193140	4.69626
II	3194612	1.34431
II	3195288	2.6486
II	3196414	3.48274
II	3197798	3.17754
II	3200043	2.27753
II	3205557	1.46123
II	3211655	6.57356
II	3214858	6.05831
II	3215201	4.80801
II	3216183	6.23231
II	3217994	6.87311
II	3220677	3.95935
II	3231569	3.26438
II	3234880	4.02904
II	3241901	8.00195
II	3242657	7.75952
II	3242902	3.10755
II	3245021	0.831696
II	3248080	5.18879
II	3248225	4.61286
II	3249225	6.59091
II	3249231	4.36353
II	3250061	2.14737
II	3254980	5.48802
II	3255420	4.65723
II	3259598	1.64775
II	3260111	2.6697
II	3261592	3.42383
II	3261607	3.37478
II	3263143	3.31664
II	3266837	2.54622
II	3270498	5.91198
II	3271993	4.51857
II	3284256	2.1039
II	3304613	2.46438
II	3308673	2.20703
II	3308908	4.62329
II	3313502	6.12998
II	3314748	3.65883
II	3319749	1.78497
II	3320303	2.12648
II	3320612	3.97153
II	3323046	3.56612
II	3325123	3.8636
II	3325926	3.13191
II	3332194	2.3057
II	3334410	5.26128
II	3334661	2.58648
II	3337888	3.70684
II	3338004	2.84574
II	3338977	1.06087
II	3339831	0.635159
II	3340560	2.01351
II	3340976	1.27565
II	3343854	3.47135
II	3354901	1.99181
II	3360711	2.33518
II	3368407	4.12034
II	3369725	4.28908
II	3370060	1.6395
II	3371000	0.744212
II	3371176	1.10301
II	3371851	3.12309
II	3374211	3.73454
II	3376071	4.64953
II	3377711	7.56175
II	3383539	5.2793
II	3387507	3.36835
II	3388710	4.28407
II	3391414	1.36353
II	3392795	2.51627
II	3393422	2.52467
II	3393444	2.16194
II	3395517	6.80195
II	3396336	4.19316
II	3400343	6.74435
II	3400707	6.7554
II	3402004	4.59282
II	3402618	4.53815
II	3402885	1.7627
II	3403106	1.58741
II	3403265	4.02268
II	3405801	3.05473
II	3405851	3.97653
II	3407996	4.51171
II	3408089	4.24334
II	3408819	3.40883
II	3408875	1.44915
II	3409550	4.82978
II	3409868	5.71913
II	3420822	3.86523
II	3424562	2.67844
II	3424666	1.71872
II	3425044	4.72874
II	3426390	3.02924
II	3428260	5.30659
II	3428654	2.10816
II	3428992	3.0507
II	3432019	5.98088
II	3438258	7.94874
II	3450634	1.88125
II	3489185	1.29047
II	3493228	3.35267
II	3496318	6.15858
II	3498761	8.71515
II	3499816	4.44089
II	3499902	1.84956
II	3500618	1.44
II	3500814	0.769803
II	3501348	2.08368
II	3501523	1.33923
II	3501567	1.86695
II	3502969	5.65893
II	3503090	4.86947
II	3503520	4.59898
II	3504102	5.25056
II	3504156	4.60804
[truncated: 1,344 more rows]
